# Supplementary material for: Whole-genome characterization of large-cell lung carcinoma: A comparative analysis based on the histological classification
Source: Front Genet. 2023 Jan 4;13:1070048. doi: 10.3389/fgene.2022.1070048 (PMC9845284; doi:10.3389/fgene.2022.1070048)
Supplement: Supplementary file 5 [file Table5.XLSX]

## Sheet: LCLC LCNEC CNV
Table S2. Comparison of CNV in LCLC and LCNEC
	LCNEC				LCLC
loss	cytoband	q value	residual q value	wide peak boundaries	cytoband	q value	residual q value	wide peak boundaries
	9p12	0.0027016	0.0027016	chr9:41014998-41047051	19p12	0.00028541	0.00028541	chr19:20588444-20728542
	11q13.2	0.0027016	0.0027016	chr11:67466257-67744313	22q11.21	0.0042001	0.0042001	chr22:20342773-20618716
	12p13.31	0.0027016	0.0027016	chr12:9620399-9725071	22q11.23	0.010825	0.010825	chr22:24334475-24399474
	8p23.1	0.003734	0.003734	chr8:7629700-7819075	8p11.22	0.034404	0.034404	chr8:39219803-39389788
	17p11.2	0.0096753	0.0096753	chr17:18946611-19066609	11q11	0.069251	0.069251	chr11:55354268-55435526
	19p12	0.0078072	0.010783	chr19:20588445-20713681	1q21.2	0.1362	0.1362	chr1:149017800-149212043
	9p12	0.0090328	0.012925	chr9:43205369-43337990	9q21.11	0.1362	0.1362	chr9:70653458-70735467
	4q13.2	0.017848	0.021401	chr4:70121575-70241157	9p11.2	0.1362	0.1362	chr9:46675831-46750693
	9q21.11	0.023917	0.023917	chr9:70497269-70842966	9p21.3	0.1362	0.1362	chr9:21495955-29583463
	9q12	0.023998	0.023998	chr9:47308654-65632927	15q11.2	0.1362	0.1362	chr15:21184816-21219304
	9p11.2	0.023998	0.031227	chr9:44532463-44651642	12p13.31	0.147	0.147	chr12:9620732-9705070
	4p16.1	0.068835	0.068835	chr4:9959965-10214691	1p36.21	0.18291	0.18291	chr1:13001322-13111130
	5q35.1	0.083489	0.083489	chr5:172129737-172339748	17q21.31	0.20741	0.20741	chr17:44390818-44615815
	9p11.2	0.083489	0.083489	chr9:45385228-45530325
	11p15.4	0.1002	0.1002	chr11:4252675-4342671
	4q13.2	0.088995	0.10105	chr4:69363961-69500229
	19p13.3	0.12568	0.18707	chr19:272030-11212273
gain	1q21.1	0.029508	0.029508	chr1:146313286-146468081	5p15.33	0.0039725	0.0039725	chr5:725089-762592
	8q24.21	0.029508	0.029508	chr8:112987391-146364022	22q11.21	0.0055905	0.018083	chr22:20342773-20618716
	11q11	0.029508	0.029508	chr11:55353165-55467595	8q24.21	0.065906	0.065906	chr8:128321499-128454830
	14q11.2	0.029508	0.029508	chr14:20146871-20186868	4q12	0.072255	0.072255	chr4:55564796-55688113
	16p11.2	0.029508	0.029508	chr16:33274722-33304108	7q22.1	0.072255	0.072255	chr7:102105966-102340953
	17q12	0.029508	0.029508	chr17:34655845-34755846	14q11.2	0.072255	0.072255	chr14:20171871-20434362
	17q21.31	0.029508	0.029508	chr17:44420818-44565815	17q12	0.072255	0.072255	chr17:34495821-34515822
	17q12	0.029508	0.029508	chr17:36270844-36390841	17q12	0.10321	0.10321	chr17:36280844-36415841
	22q11.21	0.029508	0.029508	chr22:20309441-20344438	12p13.31	0.10635	0.10635	chr12:9620732-9735072
	22q11.21	0.029508	0.029508	chr22:21449535-21559441	22q11.21	0.072255	0.11711	chr22:20971936-21574441
	1q21.1	0.029508	0.035527	chr1:144145784-144279570	16p11.2	0.21456	0.21456	chr16:33324119-33436667
	1p36.21	0.031924	0.040174	chr1:13102999-13125024	16q23.1	0.24489	0.24489	chr16:74385147-74475139
	22q11.21	0.040609	0.040609	chr22:18756841-18876788
	1p21.1	0.076734	0.076734	chr1:104163880-104313818
	1q21.2	0.054693	0.076734	chr1:148242403-148336314
	16p12.3	0.051991	0.087689	chr16:18572385-18619051
	16p13.11	0.051991	0.090719	chr16:16617293-16656043
	4p16.1	0.10956	0.10956	chr4:9221141-9374643
	4q12	0.12426	0.12426	chr4:55260329-56704668
	10p11.22	0.12426	0.12426	chr10:32762511-34102320
	8p11.22	0.13254	0.13254	chr8:37660207-38579849
	3q24	0.087689	0.13302	chr3:146724127-148508169
	3q27.2	0.090719	0.14342	chr3:184807207-185066781
	1p34.2	0.14263	0.19111	chr1:40188196-40412979
	13q11	0.20364	0.20364	chr13:19219002-19352500
	16p13.11	0.095536	0.20364	chr16:14773635-14862209
	12p13.33	0.23051	0.23051	chr12:165737-1695548
	15q11.2	0.24397	0.24397	chr15:20526234-20803328
"Bold" represents private chromosomes with CNVs in LCLC and LCNEC.
"Red" indicates shared chromosomes with different CNV in LCLC and LCNEC.
